# Supplementary material
Source: Springer Nature journal article supplement (http://www.springermedizin.de/resource/supplementary/12937_2012_533_MOESM2_ESM.pdf/25653566)

16S rDNA copies/mL

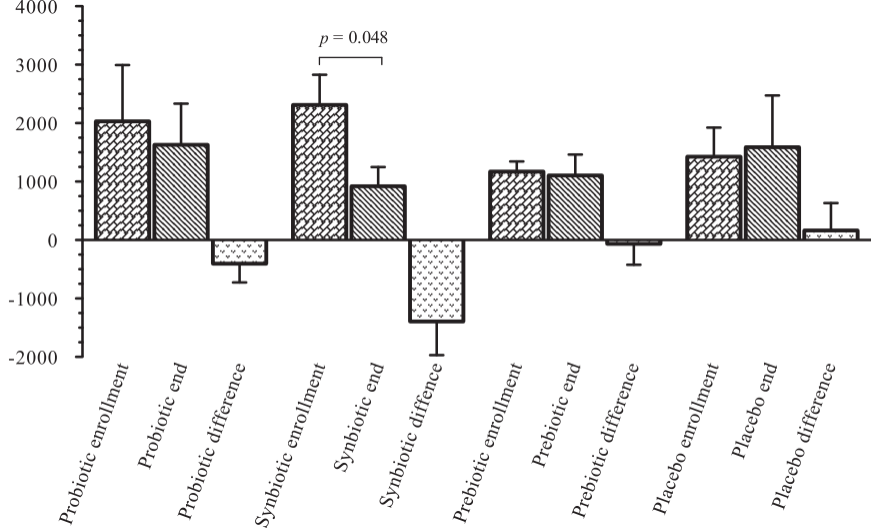

Supplement: MOESM2 [file 25653566]
